# Supplementary material
Source: PubMed Central journal article supplement (PMC2945590)
Supplement: supp_M110.152645_jbc.M110.152645-1.pdf [file supp_M110.152645_jbc.M110.152645-1.pdf]

# Supplemental Information

for

## Deciphering the Hidden Informational Content of Protein Sequences

### THE FOLDABILITY OF PROINSULIN HINGES ON A FLEXIBLE ARM THAT IS DISPENSABLE IN THE MATURE HORMONE

Ming Liu, Qing-xin Hua, Shi-Quan Hu, Wenhua Jia, Yanwu Yang, Sunil Evan Saith,  
Jonathan Whittaker, Peter Arvan\*, and Michael A. Weiss\*

#### Table of Contents

|                             |   |
|-----------------------------|---|
| Purpose of Supplement ..... | 1 |
| Figure S1 .....             | 2 |
| Figure S2 .....             | 4 |
| Figure S3 .....             | 5 |
| Table S1 .....              | 6 |
| Table S2-A .....            | 7 |
| Table S2-B .....            | 7 |
| Table S3.....               | 7 |

#### Purpose of Supplement

In Figure S1 are shown comparative 2D  $^1\text{H}$ -NMR spectra of KP-insulin and KP-proinsulin, monomeric analogs of human insulin and human proinsulin, respectively. Spectra were observed in 10 mM deuterioacetic acid at pD 3.0. In Figure S2 are shown selected arm-related NOEs extracted from 3D  $^{13}\text{C}$ -edited  $^1\text{H}$ - $^1\text{H}$  NOESY spectrum of DKP-proinsulin at pH 7.4. In Figure S3 is shown a superposition of T-state crystallographic protomers highlighting the variable positions of (and distance between) the aromatic rings of Phe<sup>B1</sup> and Tyr<sup>A14</sup>.  $^1\text{H}$ -NMR resonance assignments of *des*-Phe<sup>B1</sup>-insulin as a dimer in 10 mM deuterioacetic acid at pD 3.0 are provided in Table S1. Diagnostic main-chain  $^{13}\text{C}$ -NMR chemical shifts and secondary shifts are given in Table S2-A in relation to mean values in canonical elements of secondary structure ( $\alpha$ -helix and  $\beta$ -strand) in Table S2-B. Results of the application of a two-state thermodynamic model to CD-detected guanidine unfolding studies of insulin and *des*-B1-insulin are summarized in Table S3.

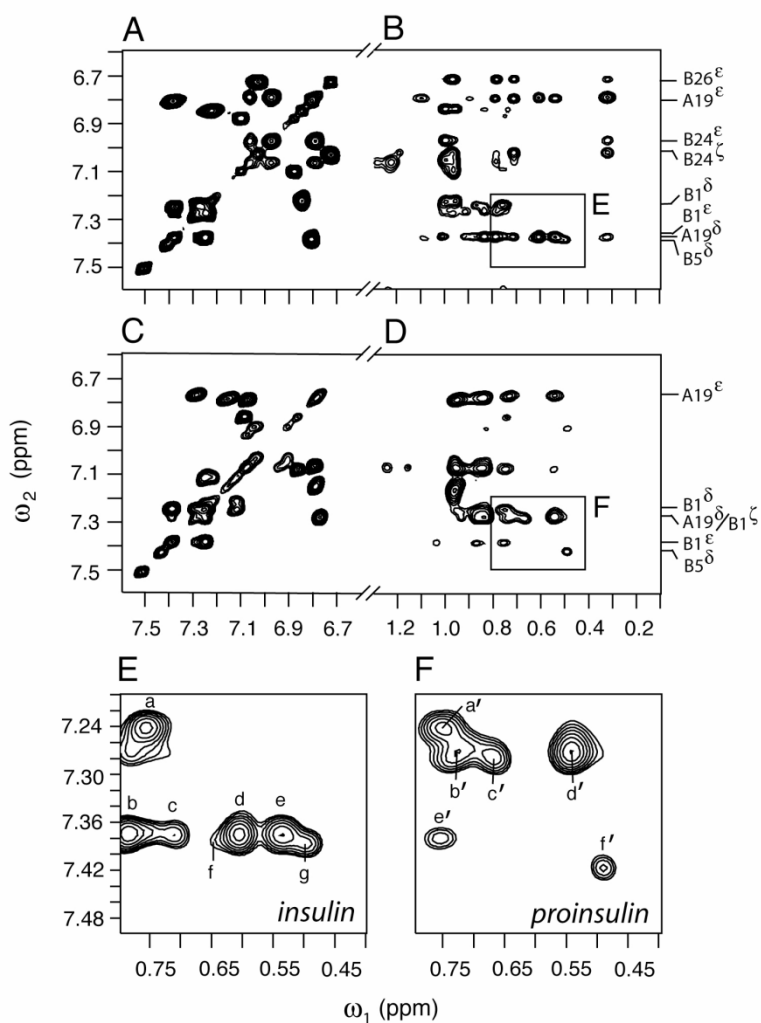

**Figure S1. N-terminal arm of proinsulin resembles T-state-specific features of insulin.** (A and B)  $^1\text{H}$ -NMR spectra of KP-insulin as a monomer in 10 mM deuterioacetic acid (pH 3.0) and 25°C. The TOCSY spectrum of aromatic spin systems (A) enables assignment of inter-residue contacts to aliphatic resonances in NOESY spectrum (B). Selected aromatic assignments are given at right. (C and D) Corresponding spectra of KP-proinsulin under the same conditions. Selected aromatic assignments are given at right. (E and F) Expansion of corresponding boxes in panels B and D, respectively. TOCSY and NOESY mixing times were in each case 55 ms and 200 ms, respectively. “KP” designates substitutions  $\text{Pro}^{\text{B28}} \rightarrow \text{Lys}$  and  $\text{Lys}^{\text{B29}} \rightarrow \text{Pro}$ , which hinder dimerization and so enable NMR studies of monomeric proteins (see main text for references). Resonance assignments are as follows. In panel E: (a)  $\text{B1H}_\delta - \text{A13 } \delta\text{-CH}_3$ ; (b)  $\text{A19 H}_\delta - \text{A16 } \delta\text{-CH}_3$ ; (c)  $\text{A19 H}_\delta - \text{A2 } \gamma'\text{-CH}_3$ ; (d) overlap of

A19 H<sub>δ</sub> - A2 δ-CH<sub>3</sub> and A19 H<sub>δ</sub> - B15 δ<sub>1</sub>-CH<sub>3</sub>; (e) A19 H<sub>δ</sub> - A2 H<sub>γ2</sub>; (f) B5 H<sub>δ</sub> - A10 γ'-CH<sub>3</sub>; and (g) B5 H<sub>δ</sub> - A10 γ'-CH<sub>3</sub>. In panel *F*: (a') B1 H<sub>δ</sub> - A13 δ-CH<sub>3</sub>; (b') A19 H<sub>δ</sub> - A2 γ'-CH<sub>3</sub>; (c') A19 H<sub>δ</sub> - B15 δ<sub>1</sub>-CH<sub>3</sub>; (d') A19 H<sub>δ</sub> - B15 δ<sub>2</sub>-CH<sub>3</sub>; and (e') B1 H<sub>δ</sub> - A13 δ-CH<sub>3</sub>; and (f') B5 H<sub>δ</sub> - A10 δ-CH<sub>3</sub>.

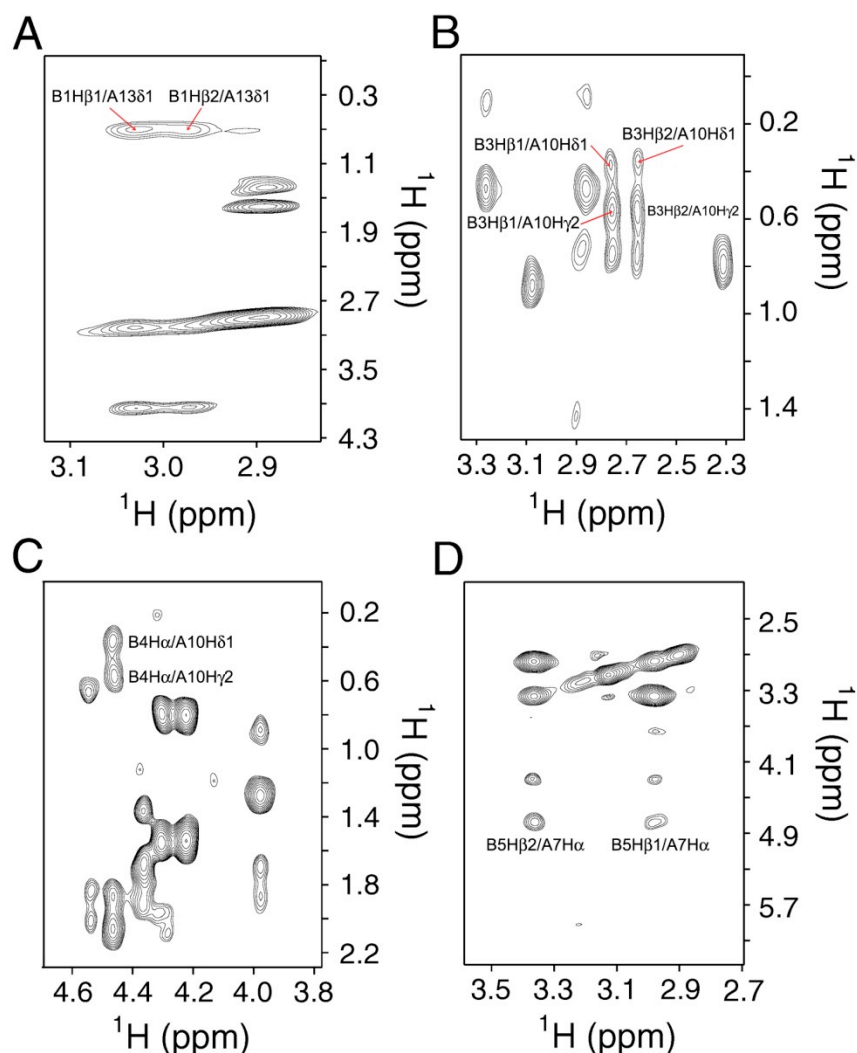

**Figure S2.**  $^{13}\text{C}$ -edited NOESY spectrum of DKP-proinsulin. Inter-residue NOEs are shown from arm-related residues: (A) Phe<sup>B1</sup> C<sub>β</sub>, (B) Asn<sup>B3</sup> C<sub>β</sub>, (C) Gln<sup>B4</sup> C<sub>α</sub>, and (D) His<sup>B5</sup> C<sub>β</sub>. Planes shown are extracted from 3D spectrum; assignments of cross peaks are as labeled. Despite such NOEs, flexibility of the distal arm is demonstrated by motional narrowing of  $^1\text{H}$ -NMR resonances and patterns of  $^{13}\text{C}$ -NMR chemical shifts (Table S2). The solution structure of DKP-proinsulin was recently described by Yang, Y. et al. (see *J. Biol. Chem.* 285, 7847-51 (2010)).

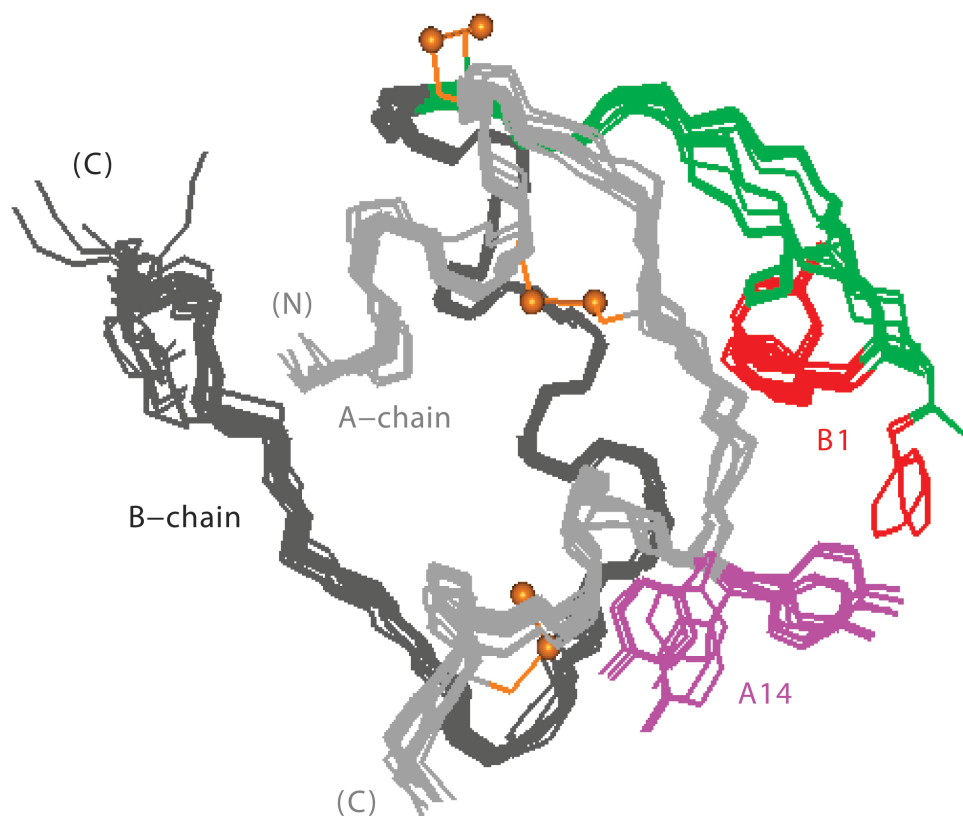

**Figure S3. Variable spatial relationships between aromatic rings of Phe<sup>B1</sup> and Tyr<sup>A14</sup>.** Superposition of 14 T-state protomers extracted from multiple crystal structures of T<sub>6</sub> and T<sub>3</sub>R<sup>f</sup><sub>3</sub> zinc insulin hexamers. Whereas a few structures predict observable NOEs between these rings (including the classical 4INS; molecules 1 and 2), the majority of structures do not and in fact exhibit ring-ring distances greater than 10 Å (see PDB entries 1APH, 1BPH, 1CPH, 1DPH, 1TRZ, 1TYL, 1TYM, 2INS, 1ZNI, 1LPH, 1G7A, 1G7A). Structures were aligned according to the main-chain atoms of helical segments B9-B19, B1-A8, and A12-A19. The side chains are B1 and A14 are highlighted in red and magenta, respectively. The A-chain is shown in light gray, and the B-chain in green (B1-B7) or dark gray (B8-B30). One representative set of disulfide bridges are shown (sulfur atoms as gold spheres).

**Table 1.** Selected chemical shifts of <sup>1</sup>H-NMR resonances of *des*-B1- insulin and wild-type insulin (pH 3.0 and 25°C)

| residue             | C <sub>γ</sub> H | C <sub>β</sub> H      | others                                                                                              |
|---------------------|------------------|-----------------------|-----------------------------------------------------------------------------------------------------|
| <b>A. analog</b>    |                  |                       |                                                                                                     |
| A3 Val              | 3.58             |                       | C <sub>γ</sub> H <sub>3</sub> 1.08, 0.96                                                            |
| A8 Thr              | 3.95             | 4.44                  | C <sub>γ</sub> H <sub>3</sub> 1.28                                                                  |
| A10 Ile             | 4.49             | 1.47                  | C <sub>γ</sub> H <sub>2</sub> 0.99,0.48, C <sub>γ</sub> 'H <sub>3</sub> 0.60, CδH <sub>3</sub> 0.24 |
| A13 leu             | 4.03             | 1.61, 1.48            | C <sub>γ</sub> H 1.52, CδH <sub>3</sub> 0.92,0.82                                                   |
| A16 Leu             | 4.15             | 1.71, 1.68            | C <sub>γ</sub> H 1.68, CδH <sub>3</sub> 0.81, 0.74                                                  |
| B2 Val              | 3.81             |                       | C <sub>γ</sub> H <sub>3</sub> 1.00                                                                  |
| B4 Gln              | 4.51             | 1.85                  |                                                                                                     |
| B6 Leu              | 4.50             | 1.76, 0.82            | C <sub>γ</sub> H 1.54,CδH <sub>3</sub> 0.80, 0.70                                                   |
| B12 Val             | 3.29             |                       | C <sub>γ</sub> H <sub>3</sub> 0.48, 0.37                                                            |
| B14 Ala             | 4.01             | CβH <sub>3</sub> 1.44 |                                                                                                     |
| B15 Leu             | 3.61             | 0.81, 0.01            | C <sub>γ</sub> H 1.21, CδH <sub>3</sub> 0.42, 0.01                                                  |
| B27 Thr             | 4.56             | 4.13                  | C <sub>γ</sub> H <sub>3</sub> 1.16                                                                  |
| B28 Pro             | 4.15             |                       | C <sub>γ</sub> H <sub>2</sub> 1.92,1.75, CδH <sub>2</sub> 3.45                                      |
| B29 Lys             | 4.40             | 1.93, 1.83            | C <sub>γ</sub> H <sub>2</sub> 1.52,1.45 CδH <sub>2</sub> 1.69, CεH <sub>2</sub> 2.99                |
| B30 Thr             | 4.34             | 4.30                  | C <sub>γ</sub> H <sub>3</sub> 1.21                                                                  |
| <b>B. wild-type</b> |                  |                       |                                                                                                     |
| A3 Val              | 3.60             |                       | C <sub>γ</sub> H <sub>3</sub> 1.09, 0.98                                                            |
| A8 Thr              | 3.98             | 4.49                  | C <sub>γ</sub> H <sub>3</sub> 1.29                                                                  |
| A10 Ile             | 4.40             | 1.52                  | C <sub>γ</sub> H <sub>2</sub> 0.98,0.47, C <sub>γ</sub> 'H <sub>3</sub> 0.63, CδH <sub>3</sub> 0.22 |
| A13 leu             | 3.74             | 1.34, 1.22            | C <sub>γ</sub> H 1.22, CδH <sub>3</sub> 0.74,0.74                                                   |
| A16 Leu             | 4.20             | 1.93, 1.61            | C <sub>γ</sub> H 1.74, CδH <sub>3</sub> 0.88, 0.81                                                  |
| B2 Val              | 4.09             | 1.85                  | C <sub>γ</sub> H <sub>3</sub> 0.86, 0.84                                                            |
| B4 Gln              | 4.51             | 1.95                  |                                                                                                     |
| B6 Leu              | 4.50             | 1.82, 0.78            | C <sub>γ</sub> H 1.62,CδH <sub>3</sub> 0.78, 0.71                                                   |
| B12 Val             | 3.32             |                       | C <sub>γ</sub> H <sub>3</sub> 0.52, 0.43                                                            |
| B14 Ala             | 4.14             | CβH <sub>3</sub> 1.47 |                                                                                                     |
| B15 Leu             | 3.63             | 1.01, 0.00            | C <sub>γ</sub> H 1.21, CδH <sub>3</sub> 0.42, 0.02                                                  |
| B27 Thr             | 4.49             | 4.18                  | C <sub>γ</sub> H <sub>3</sub> 1.18                                                                  |
| B28 Pro             | 4.19             |                       | C <sub>γ</sub> H <sub>2</sub> 1.92,1.75, CδH <sub>2</sub> 3.46                                      |
| B29 Lys             | 4.41             | 1.94, 1.83            | C <sub>γ</sub> H <sub>2</sub> 1.54,1.45 CδH <sub>2</sub> 1.71, CεH <sub>2</sub> 3.02                |
| B30 Thr             | 4.34             | 4.29                  | C <sub>γ</sub> H <sub>3</sub> 1.23                                                                  |

<sup>a</sup>Chemical shifts are relative to 5,5-dimethylsilapentanesulfonate (DSS; presumed to be at 0 ppm). Spectra were acquired in D<sub>2</sub>O and assigned by inspection based on published values. The proteins are dimeric under these conditions. Selected differences in chemical shift are consistent with absence of Phe<sup>B1</sup> ring current with retention of native-like structure (see main text).

**Table S2-A.** Arm  $^{13}\text{C}$ -chemical shifts and secondary shifts in human proinsulin

|                         | $C_\alpha$   | $C_\beta$    | $\delta_{C_\alpha}$<br>(secondary shift) | $\delta_{C_\beta}$<br>(secondary shift) |
|-------------------------|--------------|--------------|------------------------------------------|-----------------------------------------|
| <b>B1<sup>Phe</sup></b> | <b>58.36</b> | <b>41.02</b> | <b>0.36</b>                              | <b>2.02</b>                             |
| <b>B2<sup>Val</sup></b> | <b>62.00</b> | <b>32.81</b> | <b>-0.30</b>                             | <b>0.71</b>                             |
| <b>B3<sup>Asn</sup></b> | <b>53.70</b> | <b>38.22</b> | <b>0.8</b>                               | <b>0.32</b>                             |
| B4 <sup>Gln</sup>       | 54.61        | 31.37        | -1.49                                    | 2.97                                    |
| B5 <sup>His</sup>       | 57.74        | 29.25        | -                                        | -                                       |
| B6 <sup>Leu</sup>       | 53.67        | 44.90        | -1.43                                    | 2.6                                     |
| B7 <sup>Cys</sup>       | 53.94        | -            | -1.22                                    | -                                       |
| B8 <sup>Gly</sup>       | 47.50        |              | 2.4                                      |                                         |

Bold indicates chemical shifts and secondary shifts indicative of segmental flexibility. The secondary  $C_\alpha$  shifts of residues B1-B3 are either positive (B1 and B3) or not sufficiently negative (B2) to conform to a  $\beta$ -strand pattern.

The secondary  $C_\beta$  shifts of B2 and B3 are likewise attenuated. Secondary shifts are not provided for His<sup>B5</sup> due to effects of pH-dependent side-chain protonation. The large positive secondary  $C_\alpha$  shift of Gly<sup>B8</sup> reflects its positive phi angle in a T-state-specific  $\beta$ -turn. Secondary shifts are defined as the difference between observed chemical shifts and tabulated random-coil values.

**Table S2-B.** Average secondary shift of canonical  $\alpha$ -helix and  $\beta$ -strand in proinsulin

| $\alpha$ -helix<br>$\delta_{C_\alpha}$ average<br>(B9-B19) | $\alpha$ -helix<br>$\delta_{C_\beta}$ average<br>(B9-B19) | $\beta$ -strand<br>$\delta_{C_\alpha}$ average<br>(B24-B27) | $\beta$ -strand<br>$\delta_{C_\beta}$ average<br>(B24-B27) |
|------------------------------------------------------------|-----------------------------------------------------------|-------------------------------------------------------------|------------------------------------------------------------|
| 3.16                                                       | -0.65                                                     | -1.21                                                       | 1.38                                                       |

These values are in accordance with expected mean values based on the solution structure of DKP-proinsulin (Yang, Y. et al. (2010) *J. Biol. Chem.* 285, 7847-51).

**Table S3.** Thermodynamic modeling (Guanidine Denaturation)

| analog | temp (°C) | $\Delta G_u$ | $\Delta\Delta G_u$ | $C_{mid}$ | $m$ |
|--------|-----------|--------------|--------------------|-----------|-----|
|--------|-----------|--------------|--------------------|-----------|-----|

|                        |   |             |              |            | (kcal/mol/M) |
|------------------------|---|-------------|--------------|------------|--------------|
| human insulin          | 4 | 4.14 ± 0.04 | -----        | 5.1 ± 0.06 | 0.81 ± 0.01  |
| <i>des</i> -B1-insulin | 4 | 4.04 ± 0.07 | -0.36 ± 0.16 | 5.3 ± 0.1  | 0.76 ± 0.02  |

Studies conducted in 50 mM potassium phosphate (pH 7.4) at 4° C. Stability is inferred from guanidine denaturation studies based on a two-state model extrapolated to zero denaturant concentration. Uncertainties shown pertain to fitting and are taken to be ± 0.1 kcal/mole in relation to additional possible sources of experimental error (guanidine concentration, temperature, buffer pH and salt concentration).  $\Delta G_u$  and  $\Delta\Delta G_u$  values are given in kcal/mole.  $C_{mid}$  is defined as the denaturant concentration at which the fractional unfolding is 50%. The m-value represents the slope of  $\Delta G_u$  versus guanidine concentration on extrapolated to zero denaturant concentration.
